# Supplementary material
Source: publisher site journal article supplement (https://www.dovepress.com/article/548332)
Supplement: Supplementary file 1 [file Supplementary%20materials.docx]

**
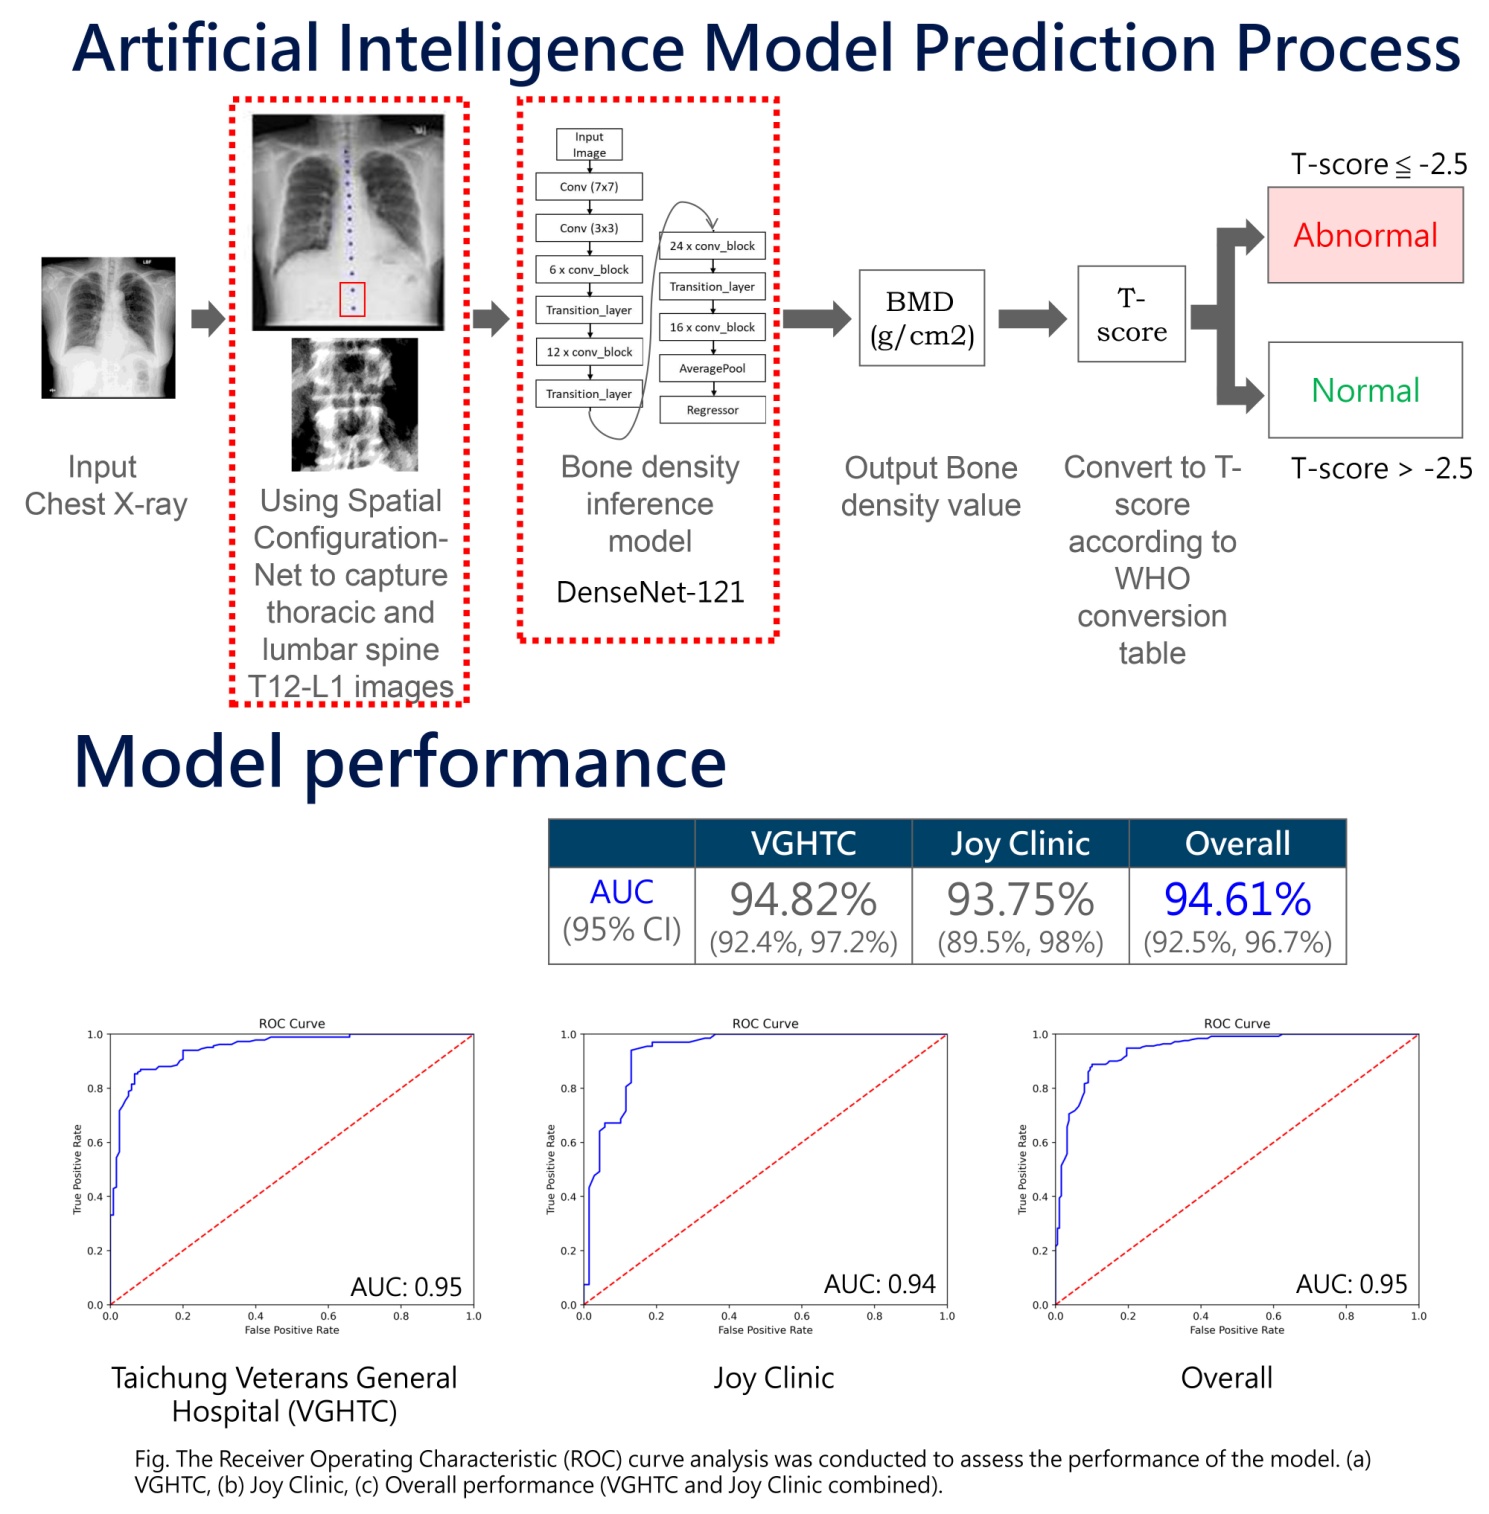
**

**Figure S1. To develope and clinically validate VeriOsteo™ OP, an AI-powered software that analyzes routine chest X-rays (CXR) to estimate lumbar spine BMD and T-scores for opportunistic osteoporosis screening**. **First TFDA-approved AI software for osteoporosis screening in Taiwan**.


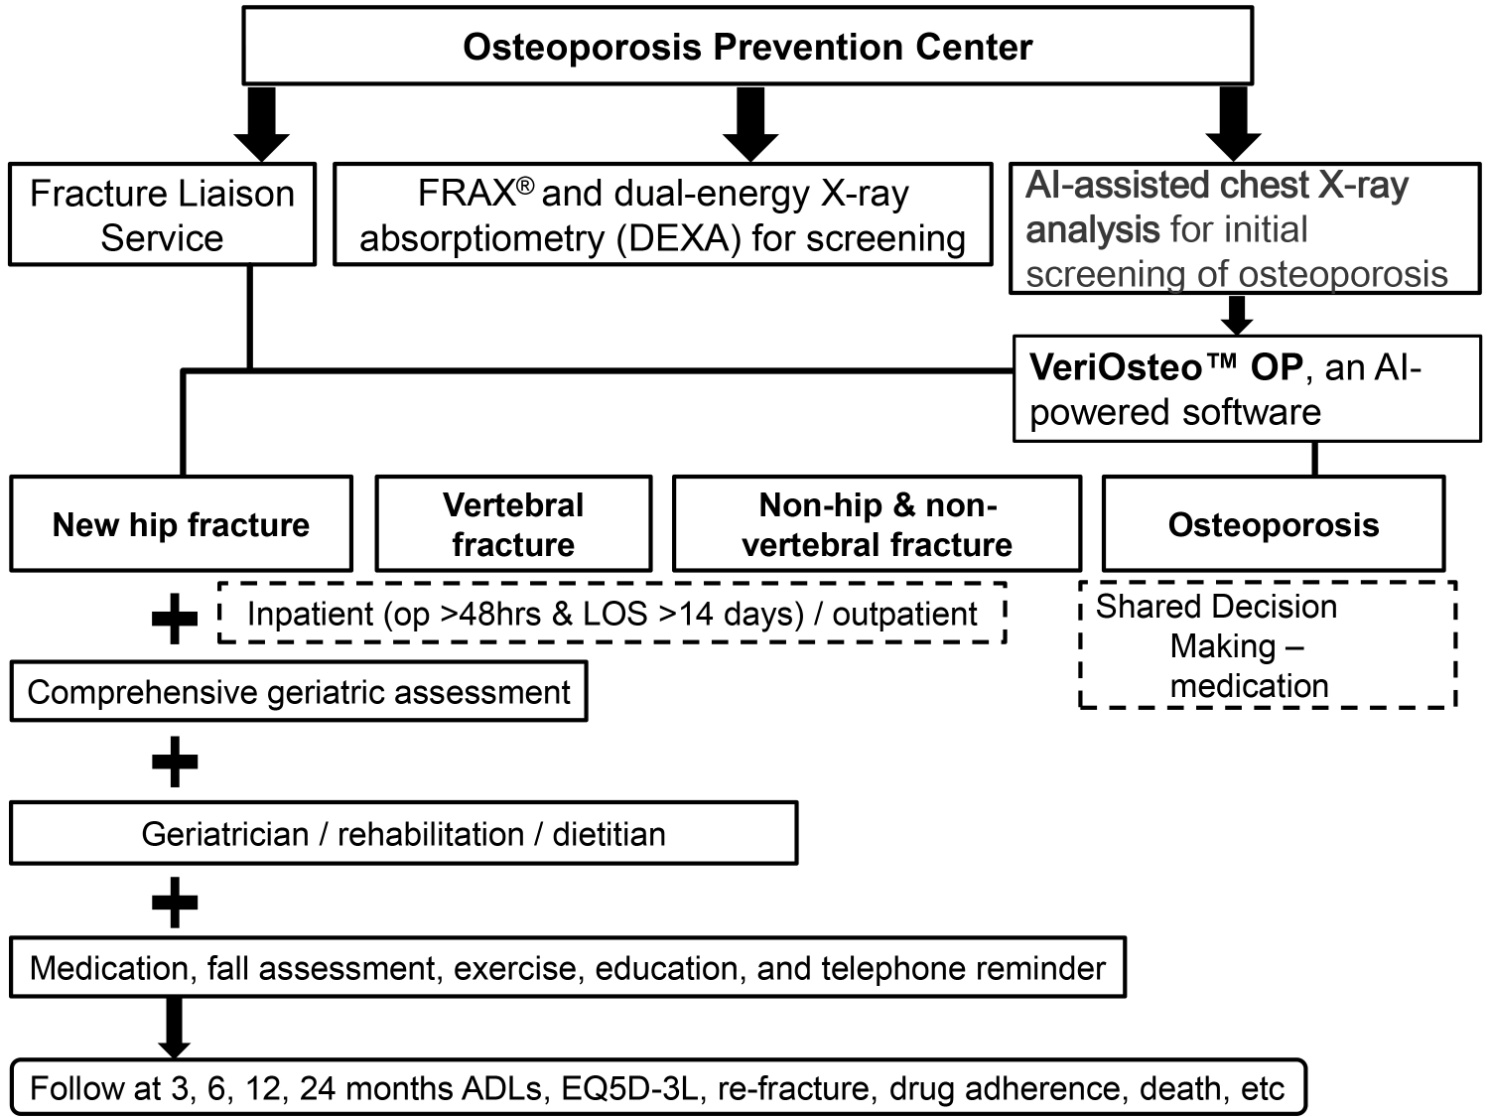


**Figure S2. Osteoporosis prevention center and Fracture Liaison Service.**

Abbreviations: ADLs, activities of daily living; EQ5D-3L, EuroQol-5 Dimensions 3 Level Version.

**Table S1. Comparative analysis of clinical parameters and data from dual-energy X-ray absorptiometry across different sarcopenia and osteoporosis groups**

|  | Neither Sarcopenia nor Osteoporosis (n = 256)1 | | Sarcopenia alone (n = 85)2 | | Osteoporosis with/without Sarcopenia (n = 204)3 | | *p* value | Dunn-Bonferroni post-hoc test | | |
| --- | --- | --- | --- | --- | --- | --- | --- | --- | --- | --- |
| Median | (IQR) | Median | (IQR) | Median | (IQR) | 1 vs 2 | 1 vs 3 | 2 vs 3 |
| **Age (yrs)** | 63.7 | (54.1–74.3) | 69.5 | (55.4–81.9) | 74.9 | (65.3–82.2) | <0.001 | 0.018 | <0.001 | 0.007 |
| <65, n (%) | 139 | (54.3) | 39 | (45.9) | 49 | (24.0) | <0.001 | <0.001 | <0.001 | <0.001 |
| 65-74, n (%) | 57 | (22.3) | 8 | (9.4) | 54 | (26.5) |  |  |  |  |
| 75-84, n (%) | 54 | (21.1) | 28 | (32.9) | 78 | (38.2) |  |  |  |  |
| ≥ 85, n (%) | 6 | (2.3) | 10 | (11.8) | 23 | (11.3) |  |  |  |  |
| **Gender, n (%)** |  |  |  |  |  |  | <0.001 | <0.001 | 0.072 | <0.001 |
| Female | 178 | (69.5) | 42 | (49.4) | 174 | (85.3) |  |  |  |  |
| Male | 78 | (30.5) | 43 | (50.6) | 30 | (14.7) |  |  |  |  |
| **ACCI** | 2.0 | (1.0–4.0) | 2.0 | (0.5–4.0) | 3.0 | (1.0–4.8) | 0.060 |  |  |  |
| BMI (kg/m2) | 25.0 | (22.9–27.6) | 20.6 | (19.2–23.5) | 22.6 | (20.8–25.4) | <0.001 | <0.001 | <0.001 | <0.001 |
| **Body composition** |  |  |  |  |  |  |  |  |  |  |
| Android fat/Gynoid fat (A/G) ratio | 1.1 | (1.0–1.3) | 1.0 | (0.8–1.2) | 1.1 | (0.9–1.2) | 0.001 | 0.012 | 0.007 | 1.000 |
| Total tissue (kg) | 62.7 | (55.3–69.9) | 50.8 | (46.1–59.0) | 51.7 | (47.1–58.2) | <0.001 | <0.001 | <0.001 | 1.000 |
| Total fat (kg) | 22.3 | (18.3–27.1) | 16.4 | (14.2–20.7) | 18.7 | (15.5–22.9) | <0.001 | 0.012 | <0.001 | 0.020 |
| Total lean tissue (kg) | 38.3 | (34.6–44.6) | 34.5 | (30.3–40.8) | 32.5 | (30.0–36.1) | <0.001 | <0.001 | <0.001 | 0.115 |
| **ASMI** (kg/m2) | 6.8 | (6.0–7.6) | 5.3 | (5.1–6.4) | 5.9 | (5.4–6.5) | <0.001 | <0.001 | <0.001 | 0.014 |
| BMD, L-spine | 1.113 | (0.997–1.249) | 1.118 | (0.970–1.238) | 0.871 | (0.788–0.992) | <0.001 | 1.000 | <0.001 | <0.001 |
| BMD, left femoral neck | 0.830 | (0.754–0.912) | 0.817 | (0.760–0.918) | 0.644 | (0.577–0.685) | <0.001 | 1.000 | <0.001 | <0.001 |
| BMD, right femoral neck | 0.831 | (0.767–0.918) | 0.840 | (0.764–0.916) | 0.641 | (0.591–0.681) | <0.001 | 1.000 | <0.001 | <0.001 |
| **T-score** | -1.5 | (-2.1– -0.4) | -1.3 | (-2.0– -0.5) | -3.1 | (-3.6– -2.8) | <0.001 | 1.000 | <0.001 | <0.001 |
| **Fracture, n (%)** | 26 | (10.2) | 7 | (8.2) | 47 | (23.0) | <0.001 | 0.678 | 0.001 | 0.004 |
| Femur | 19 | (73.1) | 6 | (85.7) | 23 | (48.9) | 0.049 | 0.652 | 0.158 | 0.161 |
| Radius | 2 | (7.7) | 1 | (14.3) | 4 | (8.5) | 0.697 |  |  |  |
| Spine | 11 | (42.3) | 1 | (14.3( | 35 | (74.5) | 0.001 | 0.223 | 0.016 | 0.012 |
| **Laboratory data** |  |  |  |  |  |  |  |  |  |  |
| Vitamin D (ng/mL) | 25.9 | (21.7–32.3) | 31.4 | (21.2–49.5) | 32.2 | (22.6–36.1) | 0.384 |  |  |  |
| Creatinine (mg/dL) | 0.8 | (0.7–1.0) | 0.9 | (0.7–1.2) | 0.8 | (0.7–1.1) | 0.216 |  |  |  |
| i-PTH (pg/mL) | 69.5 | (38.6–117.4) | 46.2 | (25.3–136.5) | 59.2 | (40.6–107.0) | 0.549 |  |  |  |
| Albumin (g/dL) | 4.3 | (4.1–4.5) | 4.2 | (3.8–4.5) | 4.2 | (3.9–4.5) | 0.005 | 0.023 | 0.028 | 1.000 |
| ALP (u/L) | 81.0 | (66.0–106.0) | 93.0 | (62.0–133.0) | 94.5 | (70.3–117.0) | 0.151 |  |  |  |
| **Medication, n (%)** | 26 | (10.2) | 7 | (8.2) | 94 | (46.1) | <0.001 | 0.678 | <0.001 | <0.001 |
| Number of medications | 1.0 | (1.0–1.3) | 1.0 | (1.0–1.0) | 1.0 | (1.0–1.0) | 0.404 |  |  |  |
| Denosumab, n (%) | 10 | (38.5) | 1 | (14.3) | 60 | (63.8) | 0.004 | 0.378 | 0.038 | 0.038 |
| Romosozumab, n (%) | 0 | (0) | 0 | (0) | 3 | (3.2) | 1.000 |  |  |  |
| Fosamax, n (%) | 7 | (26.9) | 4 | (57.1) | 9 | (9.6) | 0.002 | 0.186 | 0.066 | 0.015 |
| Raloxifene, n (%) | 9 | (34.6) | 1 | (14.3) | 18 | (19.1) | 0.213 |  |  |  |
| Teriparatide, n (%) | 4 | (15.4) | 1 | (14.3) | 18 | (19.1) | 0.914 |  |  |  |
| Zoledronic, n (%) | 2 | (7.7) | 0 | (0) | 6 | (6.4) | 0.801 |  |  |  |
| Ibandronate, n (%) | 0 | (0) | 0 | (0) | 2 | (2.1) | 1.000 |  |  |  |
| Abbreviations: ACCI, age-adjusted Charlson comorbidity index; BMI, body mass index; ASMI, appendicular skeletal muscle index; BMD, bone mineral density; i-PTH, intact parathyroid hormone; ALP, Alkaline phosphatase. | | | | | | | | | | |

**Table S2. Comparisons between survivors and deceased patients, as well as patients with or without sarcopenia and osteoporosis**

|  | Alive (n = 521) | | Deceased (n = 24) | | *p* value |
| --- | --- | --- | --- | --- | --- |
| Median | (IQR) | Median | (IQR) |
| Follow-up years | 0.7 | (0.2–1.4) | 0.3 | (0.2–2.4) | 0.198 |
| Sarcopenia & Osteoporosis, n (%) |  |  |  |  | <0.001 |
| Neither Sarcopenia nor Osteoporosis | 254 | (48.8) | 2 | (8.3) |  |
| Sarcopenia alone | 78 | (15.0) | 7 | (29.2) |  |
| Osteoporosis alone | 117 | (22.5) | 9 | (37.5) |  |
| Both Sarcopenia and Osteoporosis | 72 | (13.8) | 6 | (25.0) |  |
| Sarcopenia & Osteoporosis, n (%) |  |  |  |  | 0.001 |
| Neither Sarcopenia nor Osteoporosis | 254 | (48.8) | 2 | (8.3) |  |
| Osteoporosis alone | 117 | (22.5) | 9 | (37.5) |  |
| Sarcopenia with/without Osteoporosis | 150 | (28.8) | 13 | (54.2) |  |
| **Age** | 68.0 | (58.0–80.1) | 82.4 | (75.7–88.7) | <0.001 |
| **BMI (kg/m2)** | 23.6 | (21.2–26.1) | 23.8 | (20.0–26.5) | 0.789 |
| **ACCI** | 2.0 | (1.0–4.0) | 4.0 | (3.0–6.0) | 0.007 |
| **Body composition** |  |  |  |  |  |
| Android fat/Gynoid fat (A/G) ratio | 1.1 | (1.0–1.3) | 1.2 | (1.1–1.3) | 0.179 |
| Total tissue (kg) | 56.3 | (50.6–64.9) | 48.4 | (40.8–61.2) | 0.013 |
| Total fat (kg) | 19.8 | (16.3–24.8) | 16.5 | (14.0–23.1) | 0.129 |
| Total lean tissue (kg) | 35.5 | (31.9–41.0) | 33.4 | (27.5–38.8) | 0.031 |
| **ASMI** (kg/m2) | 6.2 | (5.6–7.0) | 6.1 | (5.4–6.4) | 0.167 |
| BMD, L-spine | 1.019 | (0.904–1.174) | 1.126 | (0.886–1.178) | 0.642 |
| BMD, left femoral neck | 0.755 | (0.674–0.859) | 0.675 | (0.606–0.804) | 0.065 |
| BMD, right femoral neck | 0.765 | (0.667–0.865) | 0.637 | (0.603–0.843) | 0.021 |
| **T-score** | -2.1 | (-2.8– -1.2) | -3.0 | (-3.5– -1.6) | 0.021 |
| **Fracture, n (%)** | 77 | (14.8) | 3 | (12.5) | 1.000 |
| Femur | 48 | (62.3) | 0 | (0) | 0.060 |
| Radius | 7 | (9.1) | 0 | (0) | 1.000 |
| Spine | 44 | (57.1) | 3 | (100) | 0.264 |
| **Laboratory data** |  |  |  |  |  |
| Vitamin D (ng/dL) | 28.8 | (21.9–35.2) | - | - | - |
| Creatinine (mg/dL) | 0.8 | (0.7–1.0) | 1.6 | (0.8–2.9) | <0.001 |
| i-PTH (pg/mL) | 60.7 | (39.0–110.0) | 107.0 | (6.7–107.0) | 0.724 |
| Albumin (g/dL) | 4.3 | (4.0–4.5) | 3.6 | (2.9–3.9) | <0.001 |
| ALP (u/L) | 86.0 | (66.0–112.0) | 119.0 | (74.0–174.0) | 0.019 |
| **Physical performance** |  |  |  |  |  |
| Timed up and go test (sec) | 11.9 | (9.1–13.2) | 18.7 | (12.0–40.5) | 0.052 |
| 6-meter walking test (sec) | 6.1 | (5.2–7.4) | 10.8 | (7.5–32.3) | 0.008 |
| Handgrip strength (kg) | 20.0 | (14.8–24.6) | 6.4 | (6.0–13.5) | <0.001 |
| **Medication, n (%)** | 116 | (22.3) | 11 | (45.8) | 0.008 |
| Number of medications | 1.0 | (1.0–1.0) | 1.0 | (1.0–1.0) | 0.105 |
| Denosumab, n (%) | 60 | (51.7) | 11 | (100) | 0.002 |
| Romosozumab, n (%) | 3 | (2.6) | 0 | (0) | 1.000 |
| Fosamax, n (%) | 20 | (17.2) | 0 | (0) | 0.211 |
| Raloxifene, n (%) | 28 | (24.1) | 0 | (0) | 0.121 |
| Teriparatide, n (%) | 23 | (19.8) | 0 | (0) | 0.213 |
| Zoledronic, n (%) | 8 | (6.9) | 0 | (0) | 1.000 |
| Ibandronate, n (%) | 2 | (1.7) | 0 | (0) | 1.000 |

Abbreviations: BMI, body mass index; ACCI, age-adjusted Charlson comorbidity index; BMD, bone mineral density; i-PTH, intact parathyroid hormone; ALP, Alkaline phosphatase.

**Table S3. The statistical power was calculated based on the number of events (deaths).**

| Sarcopenia (by Asmi) | | | | | |
| --- | --- | --- | --- | --- | --- |
|  | No (n=382) | | Yes (n=163) | | *p* value |
| n | (%) | n | (%) |
| Mortality |  |  |  |  | 0.008** |
| No | 371 | (97.1%) | 150 | (92.0%) |  |
| Yes | 11 | (2.9%) | 13 | (8.0%) |  |
| Chi-Square test. Fisher's exact test. **p*<0.05, ***p*<0.01. | | | | | |
|  |  |  |  |  |  |
| Osteoporosis (by T-score) | | | | | |
|  | No (n=341) | | Yes (n=204) | | *p* value |
| n | (%) | n | (%) |
| Mortality |  |  |  |  | 0.009** |
| No | 332 | (97.4%) | 189 | (92.6%) |  |
| Yes | 9 | (2.6%) | 15 | (7.4%) |  |
| Chi-Square test. Fisher's exact test. **p*<0.05, ***p*<0.01. | | | | | |

1. Post hoc power calculation of sarcopenia (No 382 versus Yes 163) in survival status.

**Exact -** Proportions: Inequality, two independent groups (Fisher's exact test)

**Options:** Exact distribution

**Analysis:** Post hoc: Compute achieved power

**Input:** Tail(s) = Two

Proportion p1 = 0.0290000

Proportion p2 = 0.08

α err prob = 0.05

Sample size group 1 = 382

Sample size group 2 = 163

**Output:** **Power (1-β err prob) = 0.6787769 (68%-Sarcopenia)**

Actual α = 0.0402392

1. Post hoc power calculation of osteoporosis (No 341 versus Yes 204) in survival status.

**Exact -** Proportions: Inequality, two independent groups (Fisher's exact test)

**Options:** Exact distribution

**Analysis:** Post hoc: Compute achieved power

**Input:** Tail(s) = Two

Proportion p1 = 0.0260000

Proportion p2 = 0.074

α err prob = 0.05

Sample size group 1 = 341

Sample size group 2 = 204

**Output:** **Power (1-β err prob) = 0.7076415 (71%-Osteoporosis)**

Actual α = 0.0402562

| **Table S4A.** **Cox regression analysis for all-cause mortality in patients with Denosumab** | | | | | | |
| --- | --- | --- | --- | --- | --- | --- |
|  | Multiple model | | Multiple model | | Multiple model | |
|  | HR (95%CI) | *p* value | HR (95%CI) | *p* value | HR (95%CI) | *p* value |
| Sarcopenia & Osteoporosis |  |  |  |  |  |  |
| Neither Sarcopenia nor Osteoporosis | 1.00 |  |  |  |  |  |
| **Sarcopenia alone** | **11.74 (2.42 - 56.86)** | **0.002** |  |  |  |  |
| Osteoporosis alone | 4.40 (0.86 - 22.40) | 0.074 |  |  |  |  |
| **Both Sarcopenia and Osteoporosis** | **5.52 (1.04 - 29.38)** | **0.045** |  |  |  |  |
| Sarcopenia & Osteoporosis |  |  |  |  |  |  |
| Neither Sarcopenia nor Osteoporosis |  |  | 1.00 |  |  |  |
| **Osteoporosis alone** |  |  | **5.09 (1.03 - 25.08)** | **0.046** |  |  |
| **Sarcopenia with/without Osteoporosis** |  |  | **8.27 (1.84 - 37.13)** | **0.006** |  |  |
| Sarcopenia & Osteoporosis |  |  |  |  |  |  |
| Neither SP nor OP |  |  |  |  | 1.00 |  |
| **SP alone** |  |  |  |  | **11.72 (2.42 - 56.73)** | **0.002** |
| **OP with/without SP** |  |  |  |  | **4.82 (1.01 - 23.08)** | **0.049** |
| **Denosumab** | 3.25 (1.17 - 9.05) | 0.024 | 2.48 (1.04 - 5.94) | 0.041 | 3.21 (1.16 - 8.92) | 0.025 |
| Cox regression. **p*<0.05, ***p*<0.01. | | | | | | |

| **Table S4B.** **Cox regression analysis for all-cause mortality in patients with Denosumab in the adjustment of age and ACCI** | | | | | | |
| --- | --- | --- | --- | --- | --- | --- |
|  | Multiple model | | Multiple model | | Multiple model | |
|  | HR | *p* value | HR | *p* value | HR | *p* value |
| Sarcopenia & Osteoporosis |  |  |  |  |  |  |
| Neither Sarcopenia nor Osteoporosis | 1.00 |  |  |  |  |  |
| **Sarcopenia alone** | **9.08 (1.78-46.36)** | **0.008** |  |  |  |  |
| Osteoporosis alone | 2.99 (0.59-15.21) | 0.187 |  |  |  |  |
| Both Sarcopenia and Osteoporosis | 2.99 (0.54-16.42) | 0.208 |  |  |  |  |
| Sarcopenia & Osteoporosis |  |  |  |  |  |  |
| Neither Sarcopenia nor Osteoporosis |  |  | 1.00 |  |  |  |
| Osteoporosis alone |  |  | 3.59 (0.72-17.77) | 0.117 |  |  |
| **Sarcopenia with/without Osteoporosis** |  |  | **5.20 (1.11-24.43)** | **0.037** |  |  |
| Sarcopenia & Osteoporosis |  |  |  |  |  |  |
| Neither SP nor OP |  |  |  |  | 1.00 |  |
| **SP alone** |  |  |  |  | **9.08 (1.78-46.36)** | **0.008** |
| OP with/without SP |  |  |  |  | 2.99 (0.62-14.46) | 0.173 |
| Age | 1.05 (1.01-1.10) | 0.024 | 1.05 (1.00-1.10) | 0.032 | 1.05 (1.01-1.10) | 0.023 |
| ACCI | 1.20 (1.02-1.42) | 0.027 | 1.20 (1.01-1.41) | 0.035 | 1.20 (1.02-1.42) | 0.026 |
| **Denosumab** | **2.53 (0.87-7.36)** | **0.089** | **1.69 (0.70-4.12)** | **0.246** | **2.53 (0.87-7.36)** | **0.089** |
| Cox regression. **p*<0.05, ***p*<0.01. | | | | | | |

| **Table S4C. Association between denosumab and patients with sarcopenia or osteoporosis** | | | | | | |
| --- | --- | --- | --- | --- | --- | --- |
|  | **Without Denosumab (n=474)** | | | **With Denosumab (n=71)** | | |
|  | Alive | Mortality | *p* value | Alive | Mortality | *p* value |
| Sarcopenia & Osteoporosis |  |  | **0.002** |  |  | 0.588 |
| Neither Sarcopenia nor Osteoporosis | 244 (52.9) | 2 (15.4) |  | 10 (16.7) | 0 (0) |  |
| Sarcopenia alone | 77 (16.7) | **7 (53.8)** |  | 1 (1.7) | 0 (0) |  |
| Osteoporosis alone | 84 (18.2) | 1 (7.7) |  | 33 (55.0) | **8 (72.7)** |  |
| Both Sarcopenia and Osteoporosis | 56 (12.1) | 3 (23.1) |  | 16 (26.7) | 3 (27.3) |  |
| Sarcopenia & Osteoporosis |  |  | **0.002** |  |  | 0.470 |
| Neither Sarcopenia nor Osteoporosis | 244 (52.9) | 2 (15.4) |  | 10 (16.7) | 0 (0) |  |
| Osteoporosis alone | 84 (18.2) | 1 (7.7) |  | 33 (55.0) | **8 (72.7)** |  |
| Sarcopenia with/without Osteoporosis | 133 (28.9) | **10 (76.9)** |  | 17 (28.3) | 3 (27.3) |  |
| Sarcopenia & Osteoporosis |  |  | **0.002** |  |  | **<0.001** |
| Neither SP nor OP | 244 (52.9) | 2 (15.4) |  | 10 (16.7) | 0 (0) |  |
| SP alone | 77 (16.7) | **7 (53.8)** |  | 1 (1.7) | 0 (0) |  |
| OP with/without SP | 140 (30.4) | 4 (30.8) |  | 49 (81.7) | **11 (100)** |  |
| Fisher-Freeman-Halton Exact test. **p*<0.05, ***p*<0.01. | | | | | | |

| **Table S5. 36-month survival rate and Log Rank test.**  **Figure 2a.** **Kaplan-Meier Plot based on categorization as neither sarcopenia nor osteoporosis, osteoporosis alone, and sarcopenia with/without osteoporosis at baseline.** | | |
| --- | --- | --- |
|  | 36M survival rate | Log Rank test |
| Neither SP nor OP vs **OP alone** vs OP±SP | 99.6% vs **96.8%** vs 92.4% | 0.006** |
| Neither SP nor OP vs **OP alone** | 99.6% vs **96.8%** | <0.001** |
| Neither SP nor OP vs OP±SP | 99.6% vs 92.4% | 0.013* |
| **OP alone** vs OP±SP | **96.8%** vs 92.4% | 0.199 |

| **Figure 2b. Kaplan-Meier Plot based on categorization as neither sarcopenia nor osteoporosis, sarcopenia alone, and osteoporosis with/without sarcopenia at baseline.** | | |
| --- | --- | --- |
|  | 36M survival rate | Log Rank test |
| Neither SP nor OP vs **SP alone** vs OP±SP | 99.6% vs **89.4%** vs 96.5% | 0.003** |
| Neither SP nor OP vs **SP alone** | 99.6% vs **89.4%** | <0.001** |
| Neither SP nor OP vs OP±SP | 99.6% vs 96.5% | 0.013* |
| **SP alone** vs OP±SP | **89.4%** vs 96.5% | 0.199 |

| **Table S6A. Mortality analysis of patients with or without osteoporosis medication use, comparing controls, osteoporosis alone, and sarcopenia with/without osteoporosis.** | | | | | | |
| --- | --- | --- | --- | --- | --- | --- |
|  | Without medication | | | With medication | | |
| Alive | Mortality | *p* value | Alive | Mortality | *p* value |
| Group 2 |  |  | 0.001** |  |  | 0.140 |
| Neither Sarcopenia nor Osteoporosis | 228 (56.3) | 2 (15.4) |  | 26 (22.4) | 0 (0) |  |
| Osteoporosis alone | 65 (16.0) | 1 (7.7) |  | 52 (44.8) | 8 (72.7) |  |
| Sarcopenia with/without Osteoporosis | 112 (27.7) | 10 (76.9) |  | 38 (32.8) | 3 (27.3) |  |
| Fisher-Freeman-Halton Exact test. **p*<0.05, ***p*<0.01.   | **Table S6B.** **Cox regression analysis for all-cause mortality in patients with or without osteoporosis medication among patient with sarcopenia and osteoporosis** | | | | | | | | --- | --- | --- | --- | --- | --- | --- | |  | Simple model | | | | | | |  | Total | | Without medication | | With medication | | |  | HR (95%CI) | *p* value | HR (95%CI) | *p* value | HR (95%CI) | *p* value | | **Group 2** |  |  |  |  |  |  | | Neither Sarcopenia nor Osteoporosis | 1.00 |  | 1.00 |  | --- |  | | Osteoporosis alone | 7.53 (1.62 - 34.95) | 0.010 | 1.70 (0.15 - 18.76) | 0.665 | 1.00 |  | | Sarcopenia with/without Osteoporosis | 9.71 (2.19 - 43.04) | 0.003 | 9.96 (2.18 - 45.46) | 0.003 | 0.49 (0.13 - 1.84) | 0.289 | | **With medication** | 1.73 (0.76 - 3.93) | 0.194 |  |  |  |  | | Cox regression. **p*<0.05, ***p*<0.01. | | | | | | |  | **Table S6C.** **Cox regression analysis for all-cause mortality in patients with or without osteoporosis medication among patient with sarcopenia and osteoporosis** | | | | | | | | --- | --- | --- | --- | --- | --- | --- | |  | Simple model | | | | | | |  | Total | | Without medication | | With medication | | |  | HR (95%CI) | *p* value | HR (95%CI) | *p* value | HR (95%CI) | *p* value | | **Group 2** |  |  |  |  |  |  | | Neither Sarcopenia nor Osteoporosis | 1.00 |  | 0.10 (0.02-0.46) | 0.003 | --- |  | | Osteoporosis alone | 7.53 (1.62 - 34.95) | 0.010 | 0.17 (0.02-1.34) | 0.092 | 2.05 (0.54-7.76) | 0.289 | | Sarcopenia with/without Osteoporosis | 9.71 (2.19 - 43.04) | 0.003 | 1.00 |  | 1.00 |  | | **With medication** | 1.73 (0.76 - 3.93) | 0.194 |  |  |  |  | | Cox regression. **p*<0.05, ***p*<0.01. | | | | | | | | | | | | | |
